# Supplementary material for: Potential Diagnostic Biomarker Detection for Prostate Cancer Using Untargeted and Targeted Metabolomic Profiling
Source: MDPI journal article supplement (doi:10.3390/cimb45060320), 2023-06-08
Supplement: s1 [file s1]

**Table S1.** Metabolites identification with putative names via HMDB, PubChem, Lipid Maps and Heidelberg databases.

| No  | m/z             | Identification                   |
|-----|-----------------|----------------------------------|
| 1.  | 103.0459        | Acetoacetic Acid                 |
| 2.  | 104.1132        | Gama Aminobutiric Acid (GABA)    |
| 3.  | 105.0391        | Hydroxypyruvic Acid              |
| 4.  | 107.0870        | Glyceric Acid                    |
| 5.  | 109.1077        | Quinone                          |
| 6.  | 110.0155        | Hypotaurine                      |
| 7.  | 110.0775        | 2-Aminophenol                    |
| 8.  | 111.1236        | Hydroquinone                     |
| 9.  | 112.9022        | Histamine                        |
| 10. | 113.0660        | Uracil                           |
| 11. | 113.9705        | Thiosulphate                     |
| 12. | 114.0982        | Creatinina                       |
| 13. | 114.8996        | 5,6-Dihydrouracil                |
| 14. | 116.0782        | Caproic Acid                     |
| 15. | <b>116.1142</b> | <b>Proline</b>                   |
| 16. | 117.0946        | Methyl Acetoacetate              |
| 17. | 118.0934        | Valine                           |
| 18. | 120.0880        | Threonine                        |
| 19. | 121.0570        | Purine                           |
| 20. | 121.1086        | Deoxythreonic Acid               |
| 21. | 123.0857        | Nicotinamide                     |
| 22. | 123.1245        | Erythritol                       |
| 23. | 125.1044        | 4-Methylcatechol                 |
| 24. | 125.9940        | Taurine                          |
| 25. | 127.0224        | 4-Imidazoleacetic Acid           |
| 26. | 127.0804        | Thymine                          |
| 27. | 129.1354        | Dihydrothymine                   |
| 28. | 130.0198        | 5-Oxo-D-Proline                  |
| 29. | 130.0937        | Glutaconic Acid                  |
| 30. | 130.1397        | N-Methyl-L-Proline               |
| 31. | 130.1677        | Pyroglutamic Acid                |
| 32. | 130.5691        | Pipecolic Acid ((D-Homoproline)) |
| 33. | 130.9773        | Glutaconic Acid                  |
| 34. | 131.1148        | N-Acetylputrescine               |
| 35. | 132.1105        | Leucine/Isoleucine               |
| 36. | 133.0588        | Asparagina                       |
| 37. | 133.1092        | Ornithine                        |
| 38. | 134.0692        | Aspartic Acid                    |

|     |          |                             |
|-----|----------|-----------------------------|
| 39. | 135.0187 | Deoxyribose                 |
| 40. | 135.1250 | L-Malic Acid                |
| 41. | 136.0468 | Adenine                     |
| 42. | 136.1170 | Homocysteine                |
| 43. | 137.0607 | Hipoxanthine                |
| 44. | 137.1411 | Phenylacetic Acid           |
| 45. | 138.0970 | Tyramine                    |
| 46. | 139.1205 | Nicotinamide N-Oxide        |
| 47. | 140.0769 | 6-Hydroxynicotinic Acid     |
| 48. | 141.1000 | Methyl Imidazoleacetic Acid |
| 49. | 141.9670 | Ethanolamine Phosphate      |
| 50. | 142.1318 | O-Phosphoethanolamine       |
| 51. | 143.1158 | 5-Hydroxymethyluracil       |
| 52. | 144.0058 | Proline Betaine             |
| 53. | 144.1475 | Methyl-Glutaconic Acid      |
| 54. | 144.9911 | N-Butyrylglycine            |
| 55. | 145.1313 | Caprylic Acid               |
| 56. | 146.0571 | 4-Acetamidobutanoate        |
| 57. | 146.1265 | Spermidine                  |
| 58. | 146.9783 | Alpha-Ketoglutaric Acid     |
| 59. | 147.0897 | Lysine                      |
| 60. | 147.1236 | Glutamine                   |
| 61. | 148.0521 | N-Acetylserine              |
| 62. | 148.1045 | Glutamic Acid               |
| 63. | 148.9860 | Citramalate                 |
| 64. | 149.0674 | D-2-Hydroxyglutaric Acid    |
| 65. | 149.1275 | Mevalonic Acid              |
| 66. | 150.0674 | L-Methionine                |
| 67. | 150.1202 | 3-Methyladenine             |
| 68. | 151.0523 | (S,S)-Tartaric Acid         |
| 69. | 151.1214 | D-Ribose & Isomers          |
| 70. | 152.0379 | Guanine                     |
| 71. | 152.1185 | Hydroxy Adenine             |
| 72. | 153.1372 | Xanthine                    |
| 73. | 153.9654 | Dopamine                    |
| 74. | 155.0571 | 2,4-Dihydroxybenzoic Acid   |
| 75. | 155.1360 | Hydroxytyrosol              |
| 76. | 156.0893 | Histidine                   |
| 77. | 157.0937 | Orotic Acid                 |
| 78. | 158.0107 | 3-Methylcrotonylglycine     |
| 79. | 158.1057 | 2-Amino-Muconic Acid        |

|      |          |                             |
|------|----------|-----------------------------|
| 80.  | 158.1643 | Tiglylglycine               |
| 81.  | 158.9726 | N-Acetylproline             |
| 82.  | 159.0806 | Allantoin                   |
| 83.  | 159.1247 | 3-Oxooctanoic Acid C8       |
| 84.  | 160.0704 | Isovaleryl glycine          |
| 85.  | 161.1066 | Methyl Adipic Acid          |
| 86.  | 161.1424 | Tryptamine                  |
| 87.  | 162.0172 | Alpha-Aminoadipate          |
| 88.  | 162.1005 | Indole-3-Ethanol            |
| 89.  | 162.1231 | L-Carnitine                 |
| 90.  | 163.0416 | 3-Hydroxy-3-Methylglutarate |
| 91.  | 163.0862 | 2-Hydroxyadipic Acid        |
| 92.  | 164.9388 | Acetylcysteine              |
| 93.  | 165.0651 | 2,4-Dihydroxypteridine      |
| 94.  | 165.1011 | 2-Deoxy-D-Glucose           |
| 95.  | 165.1424 | Hydroxycinnamic Acid        |
| 96.  | 166.1015 | Phenylalanine               |
| 97.  | 167.0441 | Methoxyphenylacetic Acid    |
| 98.  | 167.1170 | Phenyllactic Acid           |
| 99.  | 169.0490 | Uric Acid                   |
| 100. | 169.1515 | Pyridoxamine                |
| 101. | 169.9884 | 6-Hydroxydopamine           |
| 102. | 170.1055 | 1-Methylhistidine           |
| 103. | 171.1601 | Propylthiouracil            |
| 104. | 172.9832 | Decanoic Acid C10:0         |
| 105. | 173.1657 | Glycerol 3-Phosphate        |
| 106. | 175.1438 | Arginine                    |
| 107. | 176.0239 | Indoleacetic Acid           |
| 108. | 176.0977 | N-Acetyl-L-Aspartic Acid    |
| 109. | 176.9839 | Ascorbic Acid               |
| 110. | 177.1244 | Serotonin                   |
| 111. | 178.0729 | N-Formyl-L-Methionine       |
| 112. | 179.0121 | Cysteinylglycine            |
| 113. | 179.0959 | D-Glucono-1,5-Lactone       |
| 114. | 180.1708 | Hippuric Acid               |
| 115. | 181.0742 | Nicotinuric Acid            |
| 116. | 181.1340 | Glucose                     |
| 117. | 181.9605 | Tyrosine                    |
| 118. | 182.0900 | Hydroxy-7-Methylguanine     |
| 119. | 182.9966 | Sorbitol                    |
| 120. | 183.1230 | Homo(Methyl)Vanillic Acid   |

|      |                 |                                  |
|------|-----------------|----------------------------------|
| 121. | 185.0359        | Dihydroxymandelic Acid           |
| 122. | 186.2146        | Phosphoserine                    |
| 123. | 188.0877        | N1-Acetylspermidine              |
| 124. | 189.0999        | Azelaic Acid                     |
| 125. | 189.1391        | Cresyl Sulfate                   |
| 126. | 189.1738        | Trimethyllysine                  |
| 127. | 190.0631        | Kynurenic Acid                   |
| 128. | 190.9976        | 3-Hydroxysuberic Acid            |
| 129. | 191.1164        | 2,6-Diaminoheptanedioate         |
| 130. | 191.1803        | 5-Methoxymethyl Adipic Acid      |
| 131. | 192.9891        | 5-Hydroxyindoleacetic Acid       |
| 132. | 193.1639        | Citric acid                      |
| 133. | 195.1840        | 4-Aminohippuric Acid             |
| 134. | 197.1800        | 1,3-Dimethyluric Acid            |
| 135. | 199.1907        | Vanillylmandelic Acid            |
| 136. | 200.2359        | O-Phosphothreonine               |
| 137. | 201.1759        | Dodecanoic Acid                  |
| 138. | 202.0289        | N-Acetylaminooctanoic Acid       |
| 139. | 202.2296        | Cysteine-S-Sulfate               |
| 140. | <b>203.0655</b> | <b>Dimethylarginine/Spermine</b> |
| 141. | <b>204.1369</b> | <b>L-Acetylcarnitine</b>         |
| 142. | <b>205.1072</b> | <b>L-Tryptophan</b>              |
| 143. | 207.1749        | Lipoic Acid                      |
| 144. | 211.1308        | Glucaric Acid                    |
| 145. | 213.1737        | Vanillactic Acid                 |
| 146. | 214.2671        | Indoxyl Sulfate                  |
| 147. | 215.1395        | Methyl lauric acid               |
| 148. | 215.2006        | Tridecanoic Acid                 |
| 149. | 216.2445        | Propenoylcarnitine               |
| 150. | 217.1707        | N-Acetyl-Arginine                |
| 151. | 219.1879        | N-Acetylserotonin                |
| 152. | 221.1299        | 5-Hydroxy-Tryptophan             |
| 153. | 223.1095        | L-Cystathionine                  |
| 154. | 224.1981        | N-Acetyl-Tyrosine                |
| 155. | 227.1899        | Carnosine                        |
| 156. | 227.9970        | Deoxycytidine                    |
| 157. | 228.2325        | Deoxy Cytidine                   |
| 158. | 229.1570        | Deoxy Uridine                    |
| 159. | 229.2162        | Myristic Acid                    |
| 160. | 230.2632        | Butenyl Carnitina                |
| 161. | 235.1837        | Methoxytryptophan                |

|      |          |                                             |
|------|----------|---------------------------------------------|
| 162. | 237.2041 | Phenylalanyl-Alanine                        |
| 163. | 239.2510 | 5-Oxo-Tetradecadienoic Acid (C14:2)         |
| 164. | 244.0944 | Tiglylcarnitine                             |
| 165. | 245.0972 | Uridine                                     |
| 166. | 251.0143 | Threonylmethionine                          |
| 167. | 255.0092 | Histidylvaline                              |
| 168. | 256.2750 | Palmitamide                                 |
| 169. | 258.2956 | Glycerophosphocholine                       |
| 170. | 261.0680 | D-Glucose-6-Phosphate                       |
| 171. | 269.1789 | Homocystine                                 |
| 172. | 269.2235 | Inosine                                     |
| 173. | 277.0551 | 6-Phosphogluconic Acid                      |
| 174. | 279.2463 | Linolenic C18:3                             |
| 175. | 281.2637 | Linoleic Acid C18:2                         |
| 176. | 283.2135 | 1-Methyladenosine                           |
| 177. | 283.2712 | Oleic Acid C18:1                            |
| 178. | 284.3453 | Guanosine                                   |
| 179. | 285.1831 | Xanthosine                                  |
| 180. | 285.2742 | Stearic Acid C18:0                          |
| 181. | 286.1146 | 2'-Deoxyguanosine                           |
| 182. | 286.1210 | 2'-Deoxyguanosine                           |
| 183. | 286.3271 | L-Octenoylcarnitine                         |
| 184. | 288.3066 | C17 Sphinganine/L-Octanoylcarnitine         |
| 185. | 299.1274 | Benzoil Glucuronide, 7-Etylguanosine        |
| 186. | 299.2757 | Hydroxy Oleic Acid                          |
| 187. | 300.2230 | D-Sphingosine                               |
| 188. | 302.5827 | Sphinganine                                 |
| 189. | 303.2602 | Arachidonyl Alanine, Palmitoyl Ethanolamine |
| 190. | 304.3177 | Pimelylcarnitine                            |
| 191. | 305.1886 | Eicosatetraenoic (Arahidonic) Acid C20:4    |
| 192. | 307.2650 | 5,11-Eicosatrienoic Acid C20:3              |
| 193. | 309.1825 | 2'-Deoxyuridine 5'-Mono-Phos-Phate          |
| 194. | 309.2370 | 5,11-Eicosadienoic Acid C20:2               |
| 195. | 313.2937 | Eicosanoic (Arachidic) Acid C20:0           |
| 196. | 314.2399 | 9-Decenoylcarnitine                         |
| 197. | 316.2673 | Decanoyl Carnitine                          |
| 198. | 317.1349 | Etyltestosterone                            |
| 199. | 323.1647 | Thymidine 5'-Monophosphate                  |
| 200. | 326.3010 | N-Myristoyl Proline                         |
| 201. | 329.2604 | Docosahexaenoic Acid (C22:6)                |
| 202. | 331.0208 | Deoxycorticosterone                         |

|      |          |                                                                 |
|------|----------|-----------------------------------------------------------------|
| 203. | 331.2367 | Docosapentaenoic Acid (C22:5)                                   |
| 204. | 331.3037 | Mg(0:0/16:0/0:0)                                                |
| 205. | 332.3492 | N-Ethyl Arachidonoyl Amine                                      |
| 206. | 333.1640 | Hydroxypregnenolone                                             |
| 207. | 335.1431 | Nicotinamide Mononucleotide                                     |
| 208. | 335.2980 | Docosatrienoic Acid C22:3                                       |
| 209. | 341.2508 | Fructose 1,6-Biphosphate                                        |
| 210. | 341.3247 | 9-Hexadecenoylcholine                                           |
| 211. | 343.2411 | Sucrose                                                         |
| 212. | 346.0280 | Guanosine 3',5'-Cyclic Monophosphate                            |
| 213. | 349.2856 | Inosine 5'-Phosphate                                            |
| 214. | 353.2868 | Prostaglandin E2/D2                                             |
| 215. | 355.2959 | Mg(0:0/18:2/0:0)                                                |
| 216. | 357.2976 | Mg(0:0/18:1/0:0)                                                |
| 217. | 359.3361 | Mg(0:0/18:0/0:0)                                                |
| 218. | 363.2400 | Cortisol                                                        |
| 219. | 365.1034 | Xanthosine 5'-Monophosphate                                     |
| 220. | 365.3012 | Tetracosadienoic Acid C24:2                                     |
| 221. | 366.0156 | Sphingosine-1-P (C17 Base)                                      |
| 222. | 367.2655 | Tetracosaenoic Acid C24:1                                       |
| 223. | 368.4469 | Sphinganine-1-P (C17 Base)                                      |
| 224. | 369.2677 | Tetracosanoic Acid C24:0                                        |
| 225. | 369.3722 | Lignoceric Acid                                                 |
| 226. | 370.2295 | Tetradecenoylcarnitine                                          |
| 227. | 371.2955 | Thromboxane B2                                                  |
| 228. | 372.3682 | Tetradecanoylcarnitine                                          |
| 229. | 375.2733 | 3b-Hydroxy-5-Cholenoic Acid                                     |
| 230. | 377.1642 | Riboflavin                                                      |
| 231. | 379.3181 | MG 20:4                                                         |
| 232. | 381.3197 | MG(20:3)                                                        |
| 233. | 383.2258 | MG(20:2)                                                        |
| 234. | 385.2269 | s-(5'-Adenosyl)-L-Homocysteine/ Vitamin D3 ( Deydrocholesterol) |
| 235. | 385.3121 | Mycolipanoic Acid (C24:0)/MG(20:2)                              |
| 236. | 387.2777 | Tricaproin (C6:0)                                               |
| 237. | 387.3445 | Cholesterol                                                     |
| 238. | 388.2756 | 2'-DEOXYCYTIDINE 5'-DIPHOSPHATE                                 |
| 239. | 391.3077 | 12-Ketodeoxycholic Acid                                         |
| 240. | 393.2629 | Hyodeoxycholic Acid                                             |
| 241. | 394.3731 | C19 Sphingosine-1-Phosphate                                     |
| 242. | 396.3541 | Sphingosine 1 Phosphate                                         |
| 243. | 397.2870 | Delta Tocotrienol                                               |

|      |                 |                                                                          |
|------|-----------------|--------------------------------------------------------------------------|
| 244. | 397.3142        | Pregnenolone Sulfate                                                     |
| 245. | 399.3296        | N-Palmitoyltryptamine                                                    |
| 246. | 400.4005        | Palmitoyl Carnitine, S-Adenosyl Metionine                                |
| 247. | 405.2479        | Cortisol 21-Acetate                                                      |
| 248. | 409.2555        | Ursocholic/Muricholic Acid Acid                                          |
| 249. | 413.2947        | 25-Hydroxyvitamin D2                                                     |
| 250. | 414.2581        | Heptadecanoyl Carnitine                                                  |
| 251. | 415.2573        | Ascorbyl Palmitate                                                       |
| 252. | 419.2139        | Palmitoyl Glucuronide                                                    |
| 253. | 425.2370        | Alpha-Tocotrienol                                                        |
| 254. | 426.3780        | O-Oleoylcarnitine                                                        |
| 255. | 428.2863        | Stearoylcarnitine, ADP                                                   |
| 256. | 429.3354        | Cholesteryl Acetate                                                      |
| 257. | 429.3734        | Colesteryl Acetate, Lactoseaide Glucuronide                              |
| 258. | 440.3825        | 3-Hydroxylinoleoylcarnitine                                              |
| 259. | 443.3562        | Ascorbyl Stearate                                                        |
| 260. | 445.3450        | 1 $\alpha$ ,24,25-Trihydroxyvitamin D2                                   |
| 261. | 456.3772        | Arachidyl Carnitine                                                      |
| 262. | 458.3474        | N-Docosahexaenoyl Glutamic Acid                                          |
| 263. | 463.3265        | Arahidonoyl Serotonin                                                    |
| 264. | 468.3342        | LPC(14:0)                                                                |
| 265. | 471.3792        | Tricaprylin (C8:0)                                                       |
| 266. | 472.3516        | Cervonyl Carnitine                                                       |
| 267. | 478.3263        | LPE 18:2                                                                 |
| 268. | 482.4048        | LPC 15:0                                                                 |
| 269. | 482.4299        | LPC 15:1                                                                 |
| 270. | 484.4097        | O-Behenoylcarnitine                                                      |
| 271. | 485.2951        | Uridine 5'-Triphosphate                                                  |
| 272. | 485.3853        | LPA(22:5)                                                                |
| 273. | 487.3841        | LPA(22:5)                                                                |
| 274. | 489.3679        | Cytidine 5'-Diphosphocholine                                             |
| 275. | 494.3487        | LPC (16:1)                                                               |
| 276. | 496.3751        | LPC (16:0)                                                               |
| 277. | 502.3993        | LPE(20:4)                                                                |
| 278. | 504.2933        | LPE(20:3)                                                                |
| 279. | 507.3401        | Oleyl Palmitate & Isomers C <sub>34</sub> H <sub>66</sub> O <sub>2</sub> |
| 280. | 509.4034        | Stearyl Palmitate                                                        |
| 281. | 516.3799        | LPC(18:4)                                                                |
| 282. | 518.3176        | LPC(18:3)                                                                |
| 283. | <b>520.3663</b> | <b>LPC(18:2)</b>                                                         |
| 284. | 522.3823        | LPC(18:1)                                                                |

|      |          |                            |
|------|----------|----------------------------|
| 285. | 523.8918 | Guanosine Triphosphate     |
| 286. | 524.3987 | LPC(18:0)                  |
| 287. | 526.4304 | LPS(18:0)                  |
| 288. | 529.3151 | Linolenyl Oleate           |
| 289. | 531.4349 | Linolenyl Stearate         |
| 290. | 537.4373 | Stearyl Stearate & Isomers |
| 291. | 540.1825 | Hexacosanoyl Carnitine     |
| 292. | 540.4095 | Cer(D18:0/16:0)            |
| 293. | 542.3503 | LPC(20:5)                  |
| 294. | 544.3668 | LPC (20:4)                 |
| 295. | 546.4028 | LPC (20:3)                 |
| 296. | 548.0824 | LPC (20:2)                 |

\*all proteogenic amino acids (AA) identified in this study are L amino acids (because all identifications were performed on human plasma samples), although the method used does not discriminate between L and D series.
